# Supplementary material for: Competitive adsorption on gold nanoparticles for human papillomavirus 16 L1 protein detection by LDI-MS
Source: Royal Society of Chemistry journal article supplement (doi:10.1039/c9an01612k), 2019-01-01
Supplement: c9an01612k1.pdf [file c9an01612k1.pdf]

# Supporting Information

## Competitive Adsorption on Gold Nanoparticle for Human Papillomavirus 16 L1 Protein Detection by LDI- MS

*Li Zhu<sup>†,§</sup>, Han Jing<sup>‡</sup>, Zhihua Wang<sup>\*,†</sup>, Lihui Yin<sup>§</sup>, Zhang Wei<sup>§</sup>, You Peng<sup>ζ</sup>, Zongxiu Nie<sup>\*,‡</sup>*

---

<sup>†</sup> State Key Laboratory of Chemical Resource Engineering, and  
Beijing Advanced Innovation Center for Soft Matter Science and  
Engineering, Beijing University of Chemical Technology, Beijing  
100029 China

<sup>‡</sup> Beijing National Laboratory for Molecular Sciences, Key  
Laboratory of Analytical Chemistry for Living Biosystems, Institute  
of Chemistry, Chinese Academy of Sciences, Beijing 100190 China

<sup>§</sup> National Institutes for Food and Drug Control, Beijing 102629  
China;

<sup>ζ</sup> Department of Chemistry and Environment Engineering, Jiujiang  
University, Jiujiang, 332005 China.

Corresponding author:

Prof. Zongxiu Nie; E-mail: [znie@iccas.ac.cn](mailto:znie@iccas.ac.cn);

Prof. Zhihua Wang; E-mail: [zhwang@mail.buct.edu.cn](mailto:zhwang@mail.buct.edu.cn).

## Preparation of reagents

A stock solution of HPV16 L1 aptamer (20  $\mu$ M) was prepared in DEPC water. Further dilutions of this solution were prepared in disodium hydrogen phosphate-citrate buffer (pH 3, pH 5, pH 7). A stock solution of 1 M NaCl was prepared by dissolving 40mg in 1ml of DEPC water and, accordingly, was diluted for optimization studies. A standard solution of HPV16 L1 was prepared by dissolving 50  $\mu$ g of recombinant HPV16 L1 (abcom, USA) in 50  $\mu$ L of DEPC water. Then dilute with binding buffer to the required concentration.

5-nm Au nanoparticles (AuNPs) were synthesized according to previous report <sup>[1]</sup>. Briefly, 10 mL of 1 mM HAuCl<sub>4</sub> was mixed with 1 mL of 38.8 mM trisodium citrate and vigorously stirred for 15 min. The mixture of 0.4  $\mu$ g NaBH<sub>4</sub> and 0.4 mL trisodium citrate (38.8 mM) was slowly added to the precursor solution and stirred for 2 h.

40-nm Au nanoparticles (AuNPs) were synthesized according to previous report<sup>[2]</sup>. Briefly, 50 mL of 0.014% HAuCl<sub>4</sub>·4H<sub>2</sub>O was boiling, and then 8 mL of 1% trisodium citrate was added to the boiling HAuCl<sub>4</sub>. The solution was kept boiling for 15 min and then cooled to room temperature under stirring.

The molar concentration of AuNPs was calculated by measuring UV-vis absorbance (Fig S3) using the formula:  $C = A_{450}/\epsilon_{450}$ , where  $\epsilon_{450}$  is

the molar extinction coefficient at 450 nm. The calculated particle concentration of AuNPs was approximately 2.5 nM.

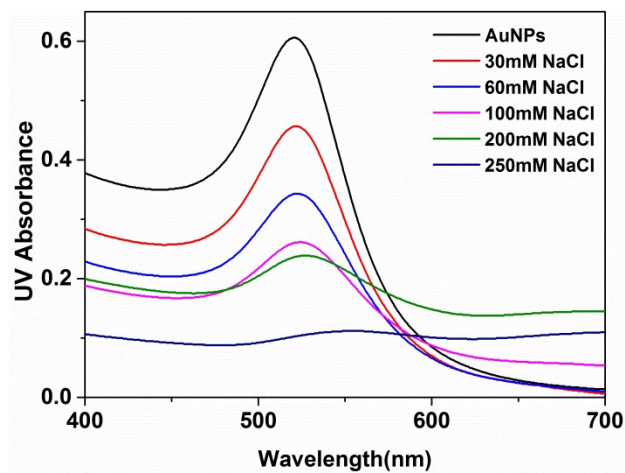

**Fig.S1** UV spectrum of AuNPs with various NaCl concentrations

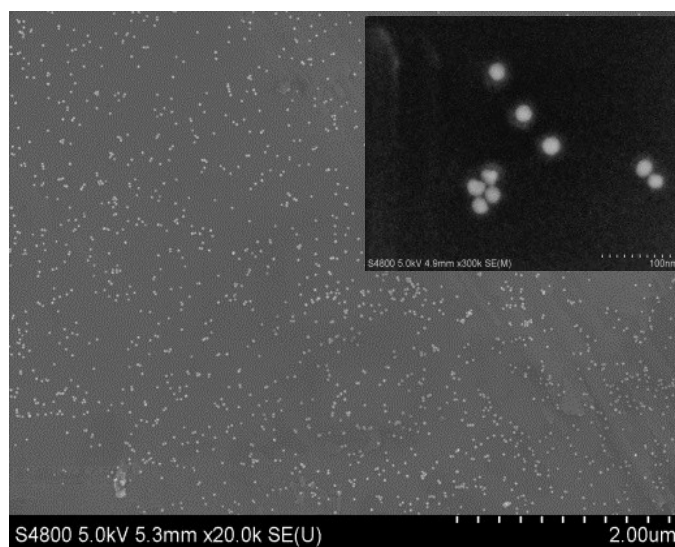

**Fig.S2** SEM image of AuNPs(20 nm)

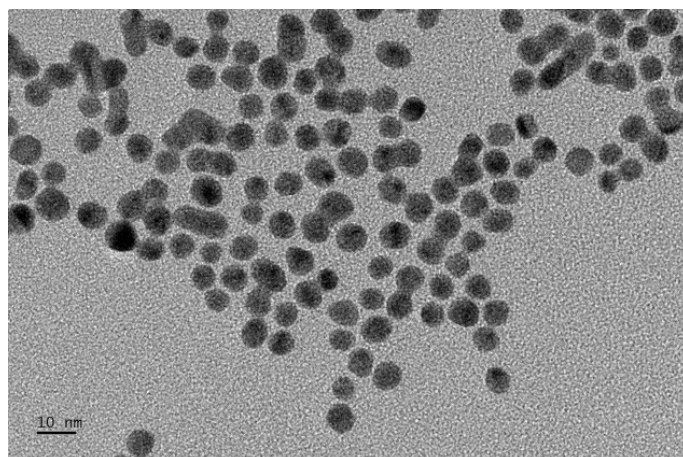

**Fig.S3** TEM image of AuNPs(5 nm)

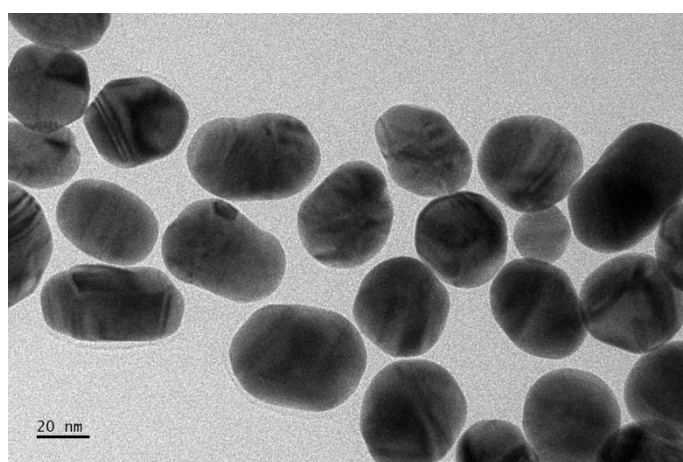

**Fig.S4** TEM image of AuNPs(40 nm)

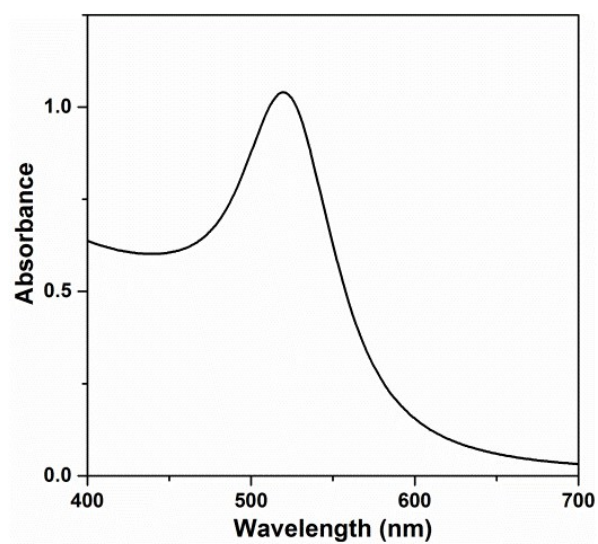

**Fig.S5** UV spectrum of AuNPs

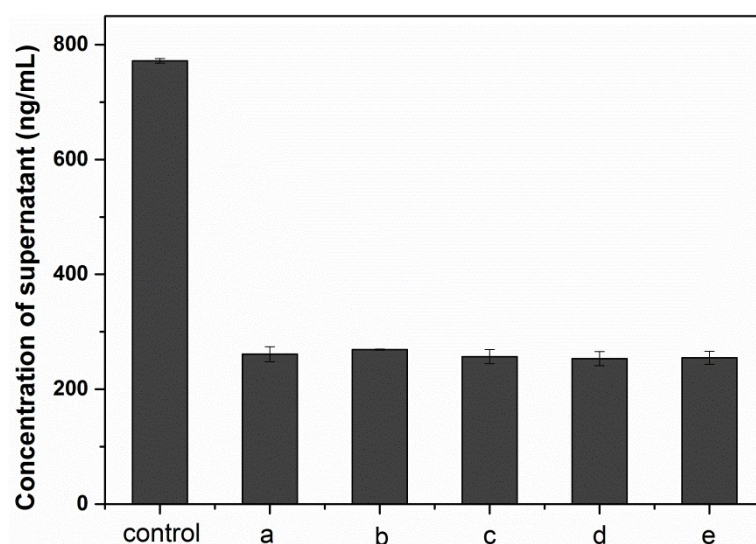

**Fig.S6** Concentration of APT<sub>HPV 16L1</sub> (control) and the unattached APT<sub>HPV 16L1</sub> after mixing APT<sub>HPV 16L1</sub> with AuNPs (a), with the addition of 0.1 mM K<sup>+</sup>, Mg<sup>2+</sup>, tyrosine and cysteine (b-e),

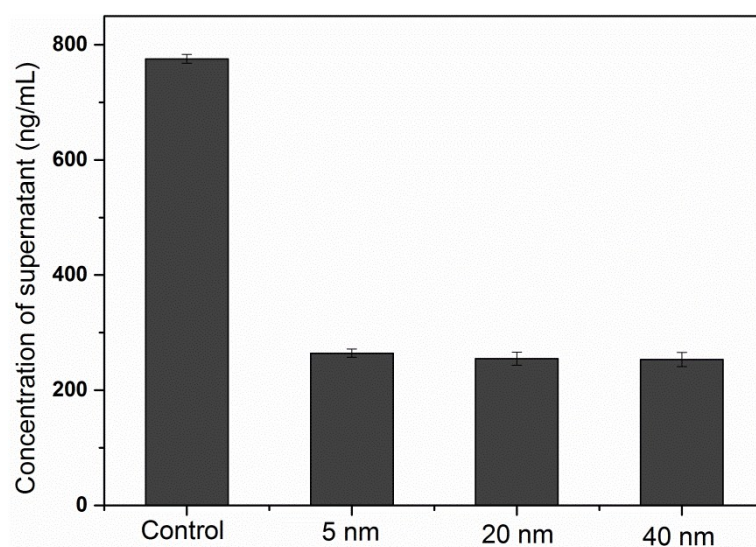

**Fig.S7** Concentration of the unattached APT<sub>HPV 16 L1</sub> after mixing ssDNA with different size of AuNPs (5, 20 and 40 nm).

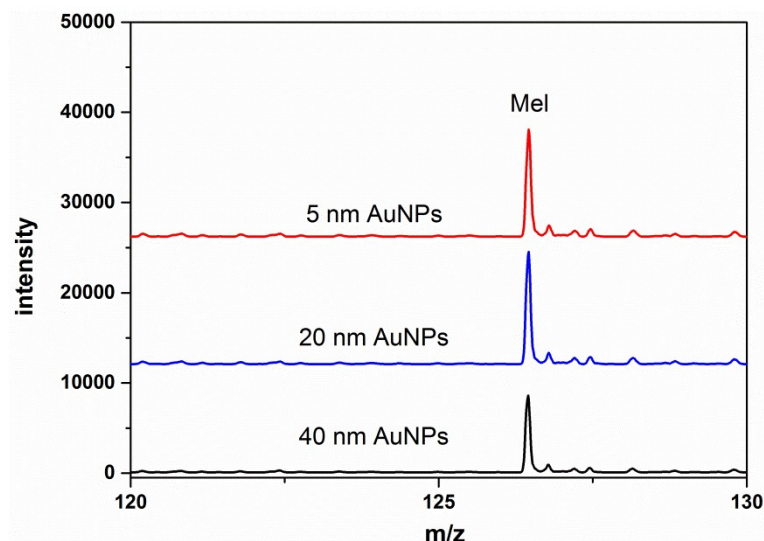

**Fig.S8** MS spectrum of Mel in the experiments of aptamer mixing with different size of AuNPs (5, 20 and 40 nm) to detect HPV 16 L1 protein.

**Table S1.** MS approach of HPV16 L1 calibration solutions.

| HPV16 L1 protein<br>Concentration (ng/mL) | Mean ratio for Mel/Mel-CH <sub>3</sub><br>in three assays | SD    |
|-------------------------------------------|-----------------------------------------------------------|-------|
| 0                                         | 0.011                                                     | 0.003 |
| 2                                         | 0.551                                                     | 0.155 |
| 10                                        | 0.943                                                     | 0.175 |
| 20                                        | 1.787                                                     | 0.280 |
| 40                                        | 3.384                                                     | 0.506 |
| 60                                        | 5.039                                                     | 0.550 |
| 80                                        | 6.505                                                     | 0.506 |

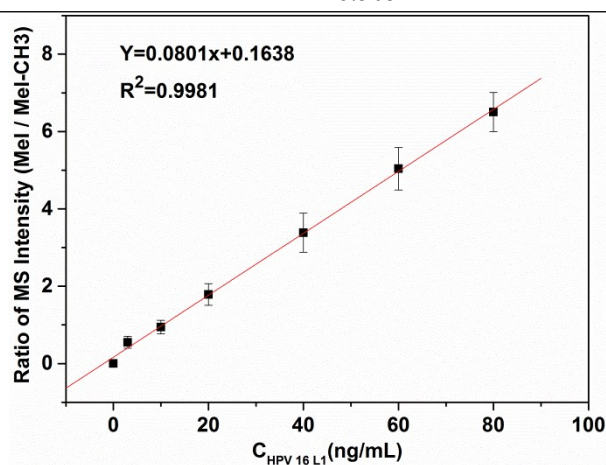

**Fig. S9** Linear calibration curve of clinical samples detected by LDI-TOF MS



**Table S2** LDI MS approach results for real sample

| Sample name              | HPV16 L1 protein Concentration (ng/mL)(n=3) | SD    |
|--------------------------|---------------------------------------------|-------|
| Positive clinical sample | 119.8                                       | 0.019 |
| Negative clinical sample | n.d.                                        | /     |
| Vaccine sample           | 33842.0                                     | 0.032 |

n.d. = not detected

**Table S3** ELISA of HPV16 L1 calibration solutions

| HPV16 L1 protein Concentration (ng/mL) | 0     | 15    | 30    | 60    | 120   | 240   |
|----------------------------------------|-------|-------|-------|-------|-------|-------|
| optical density(OD)                    | 0.019 | 0.156 | 0.222 | 0.339 | 0.778 | 1.605 |
|                                        | 0.024 | 0.145 | 0.213 | 0.342 | 0.757 | 1.602 |
|                                        | 0.025 | 0.137 | 0.209 | 0.326 | 0.746 | 1.589 |
|                                        | 0.021 | 0.147 | 0.227 | 0.352 | 0.749 | 1.595 |

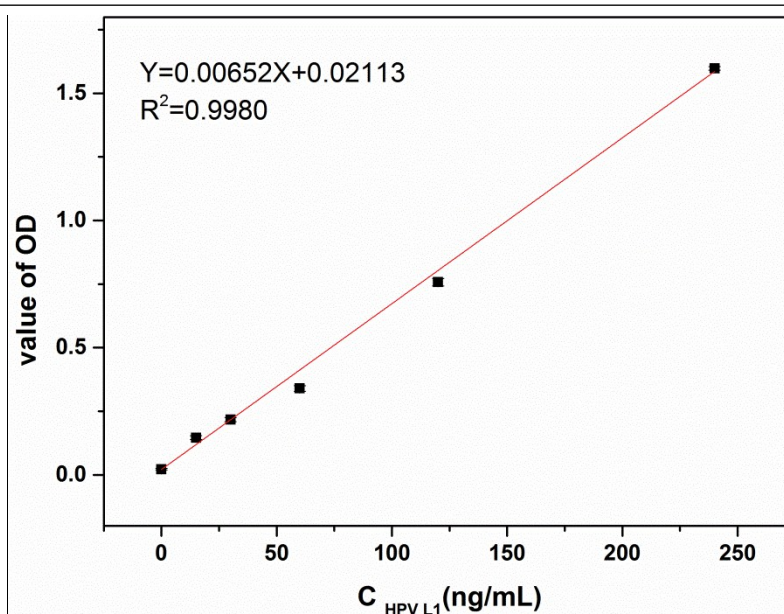**Fig. S10** Linear calibration curve of clinical samples detected by ELISA**Table S4** ELISA approach results for real sample

| Sample name              | HPV16 L1 protein Concentration (ng/mL)<br>(n=5) | SD    |
|--------------------------|-------------------------------------------------|-------|
| Positive clinical sample | 102.5                                           | 0.041 |
| Negative clinical sample | n.d.                                            | /     |
| Vaccine sample           | 37861.8                                         | 0.060 |

n.d.= not detected

**Table S5** LDI TOF recoveries for real sample

| Sample No. | Sample content (n=3), ng/mL | Added,ng/mL | Found(n=3),ng/mL | RSD(n=3)% | Recoveries% |
|------------|-----------------------------|-------------|------------------|-----------|-------------|
| 1          | 24                          | 5           | 26               | 2.8       | 89.7        |
| 2          | 24                          | 20          | 48               | 1.5       | 109.1       |
| 3          | 24                          | 50          | 71               | 1.9       | 96.0        |

## Reference

[1]Khoa N T, Kim S W, Yoo D H, et al. Size-dependent work function and catalytic performance of gold nanoparticles decorated graphene oxide sheets[J]. Applied Catalysis A General, 2014, 469(3):159–164.

[2] Duan J, Yang M, Lai Y, et al. A colorimetric and surface-enhanced Raman scattering dual-signal sensor for Hg<sup>2+</sup> based on Bismuthiol II-capped gold nanoparticles[J]. Analytica Chimica Acta, 2012, 723(723):88-93.
